# Supplementary material
Source: PubMed Central journal article supplement (PMC470769)

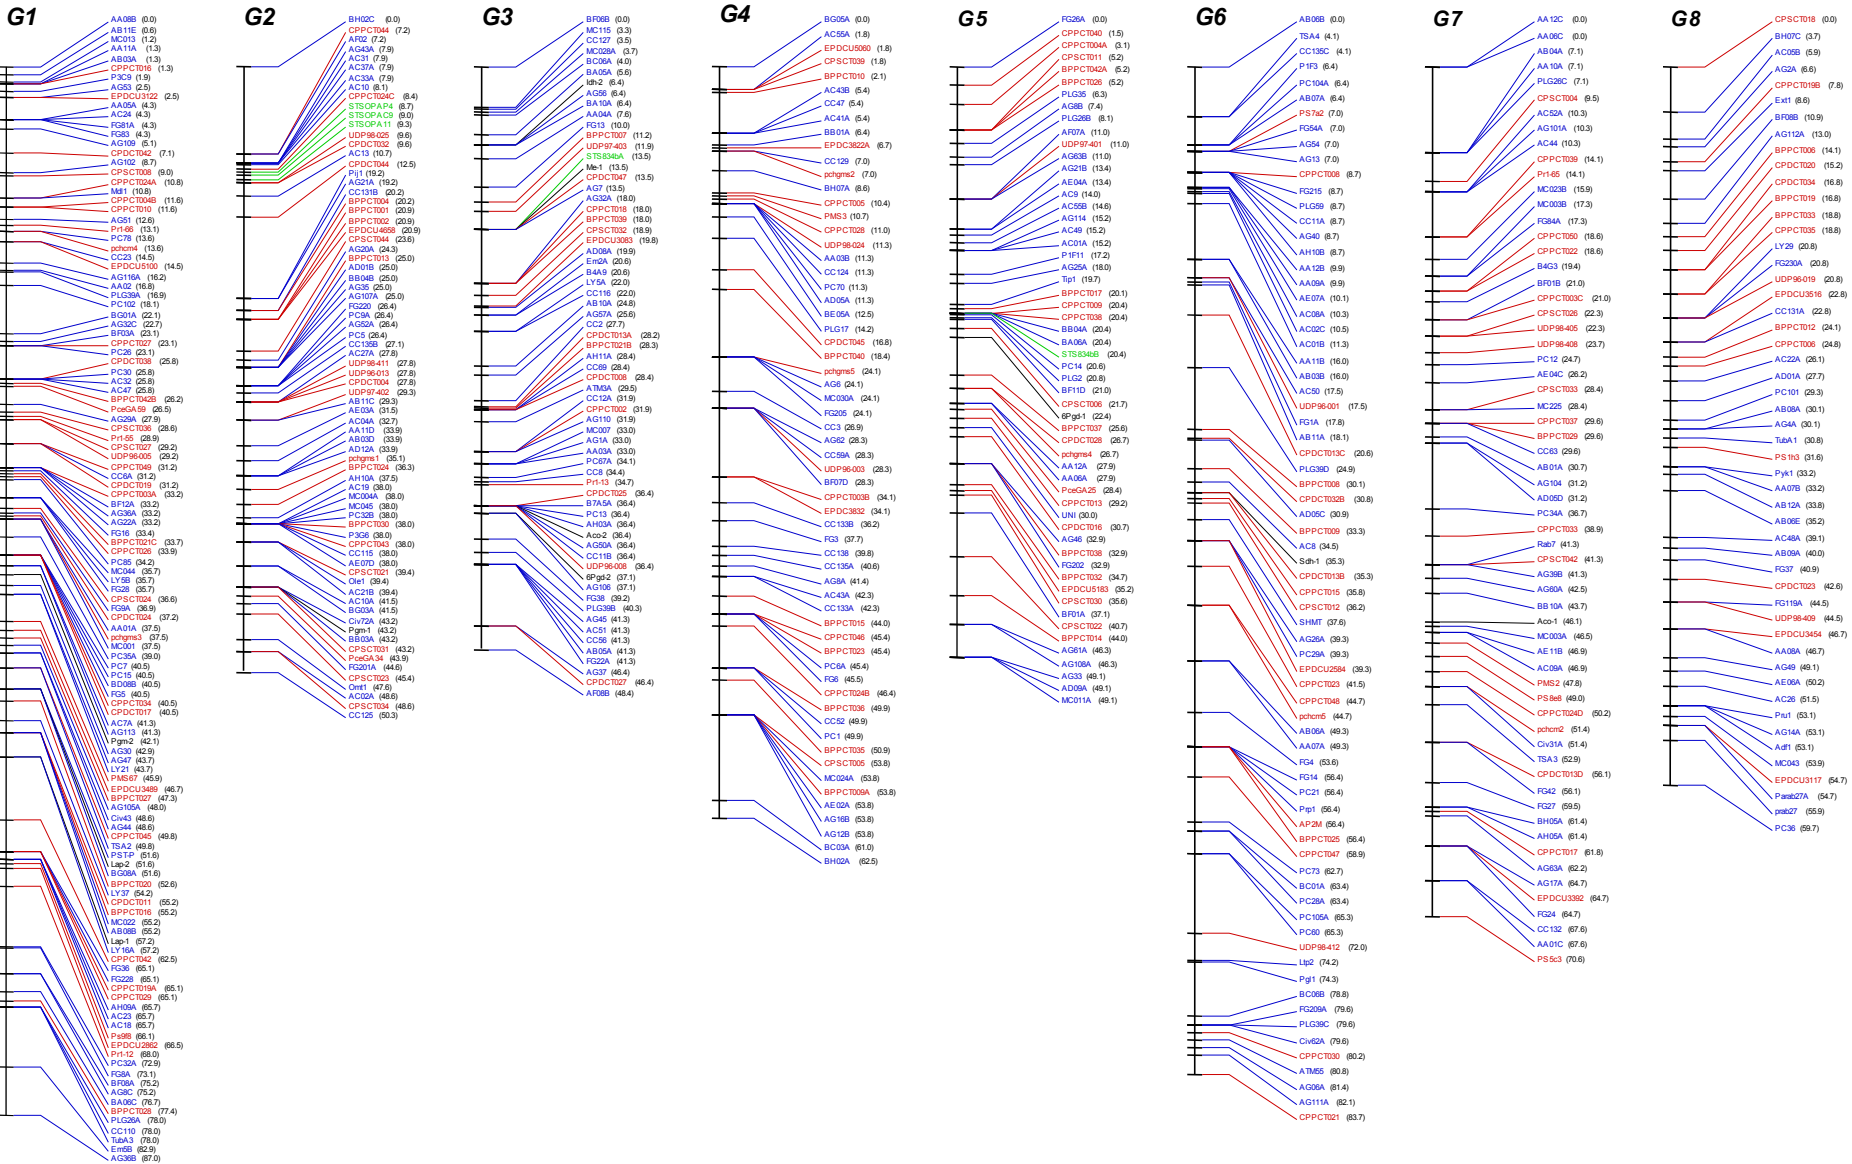

Supplement: pnas_101_26_9891__1.pdf [file pnas_101_26_9891__1.pdf]

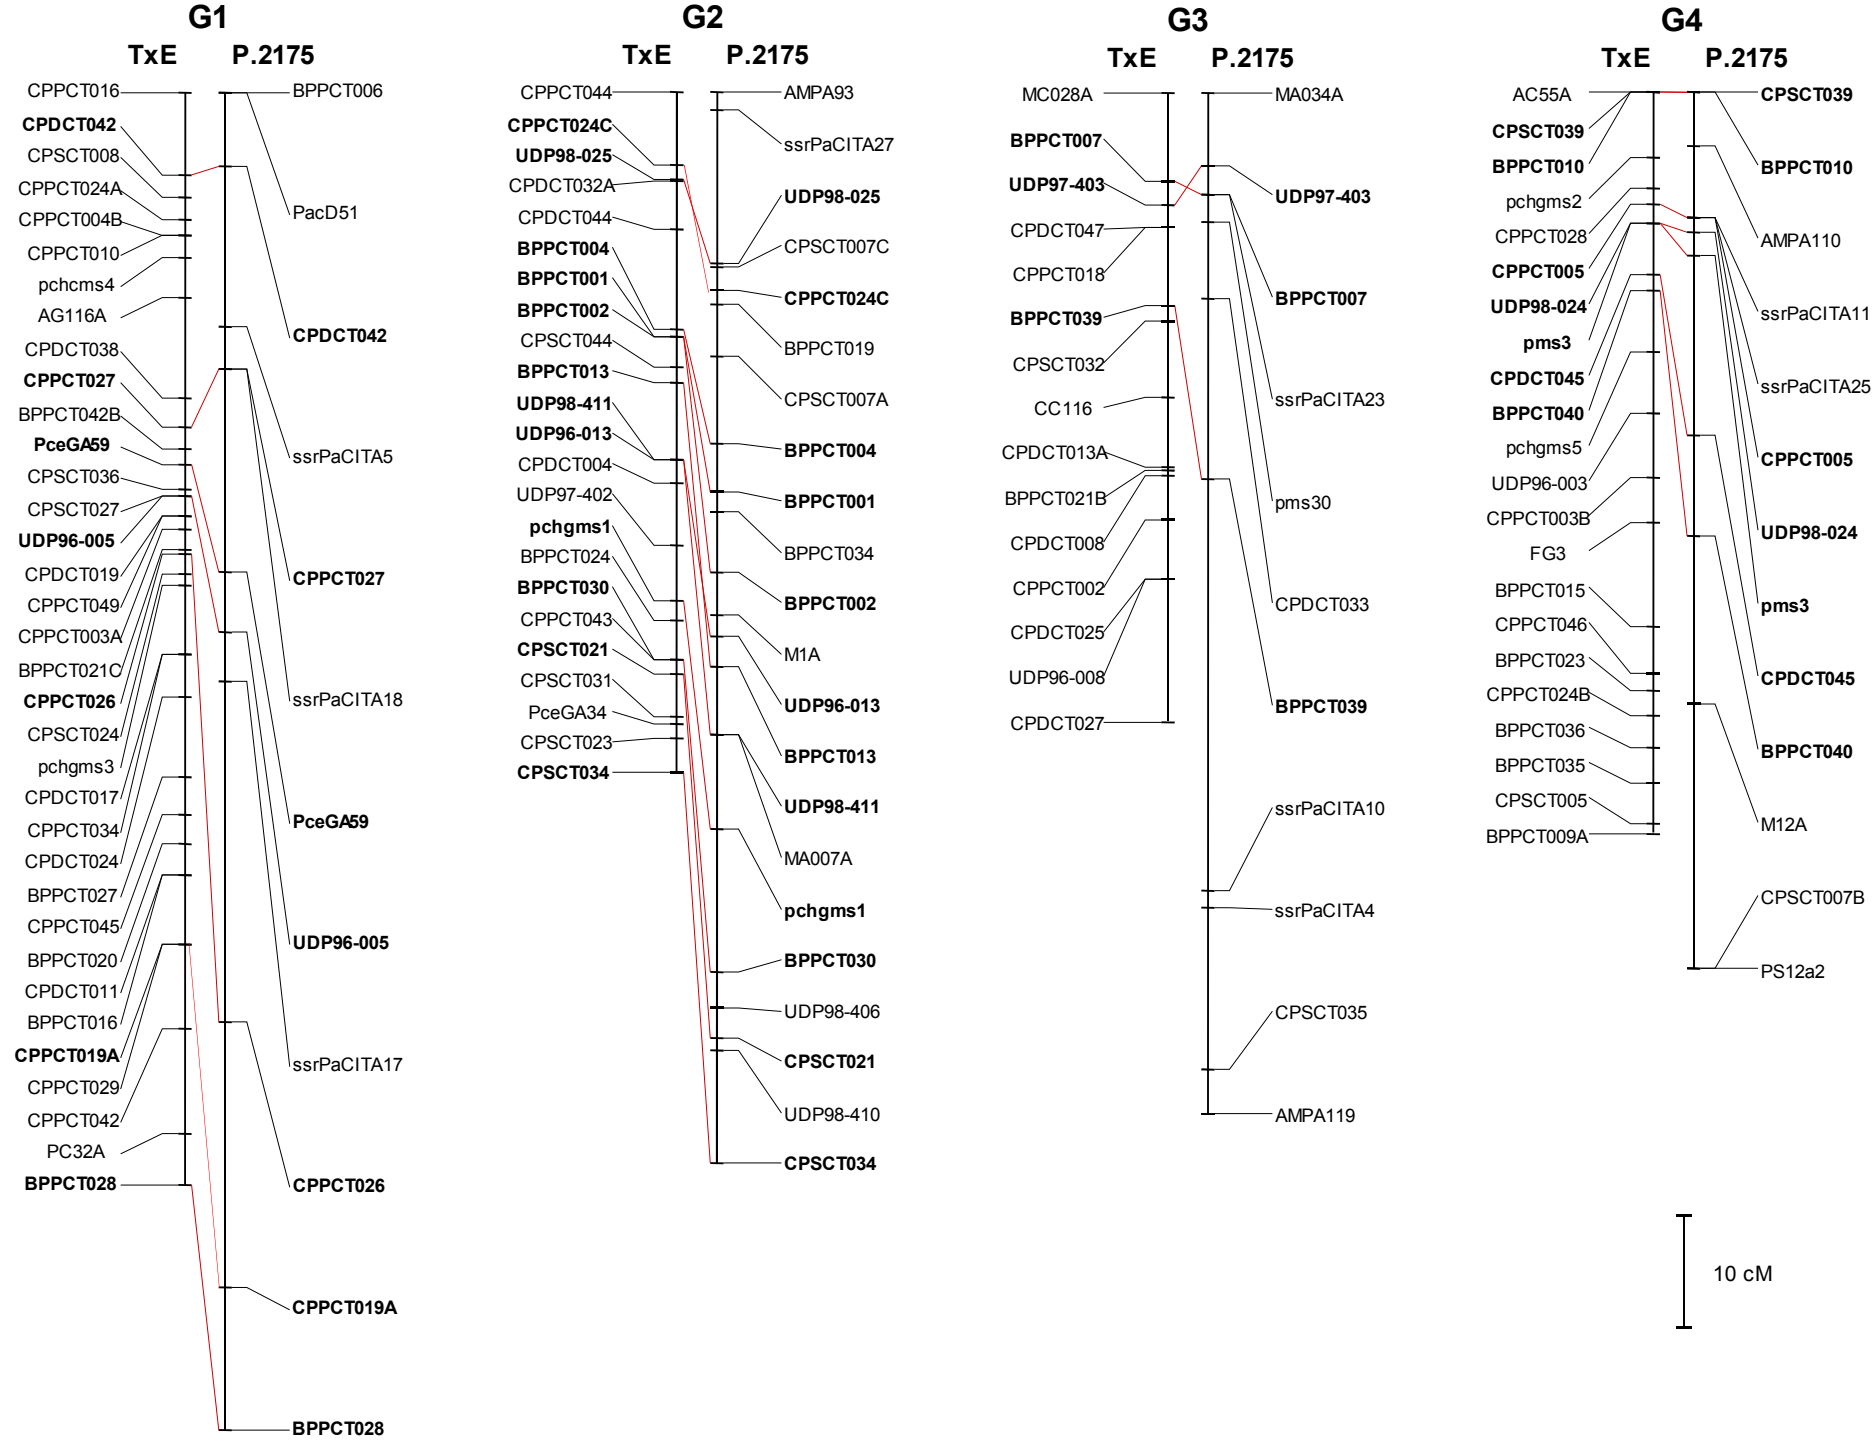

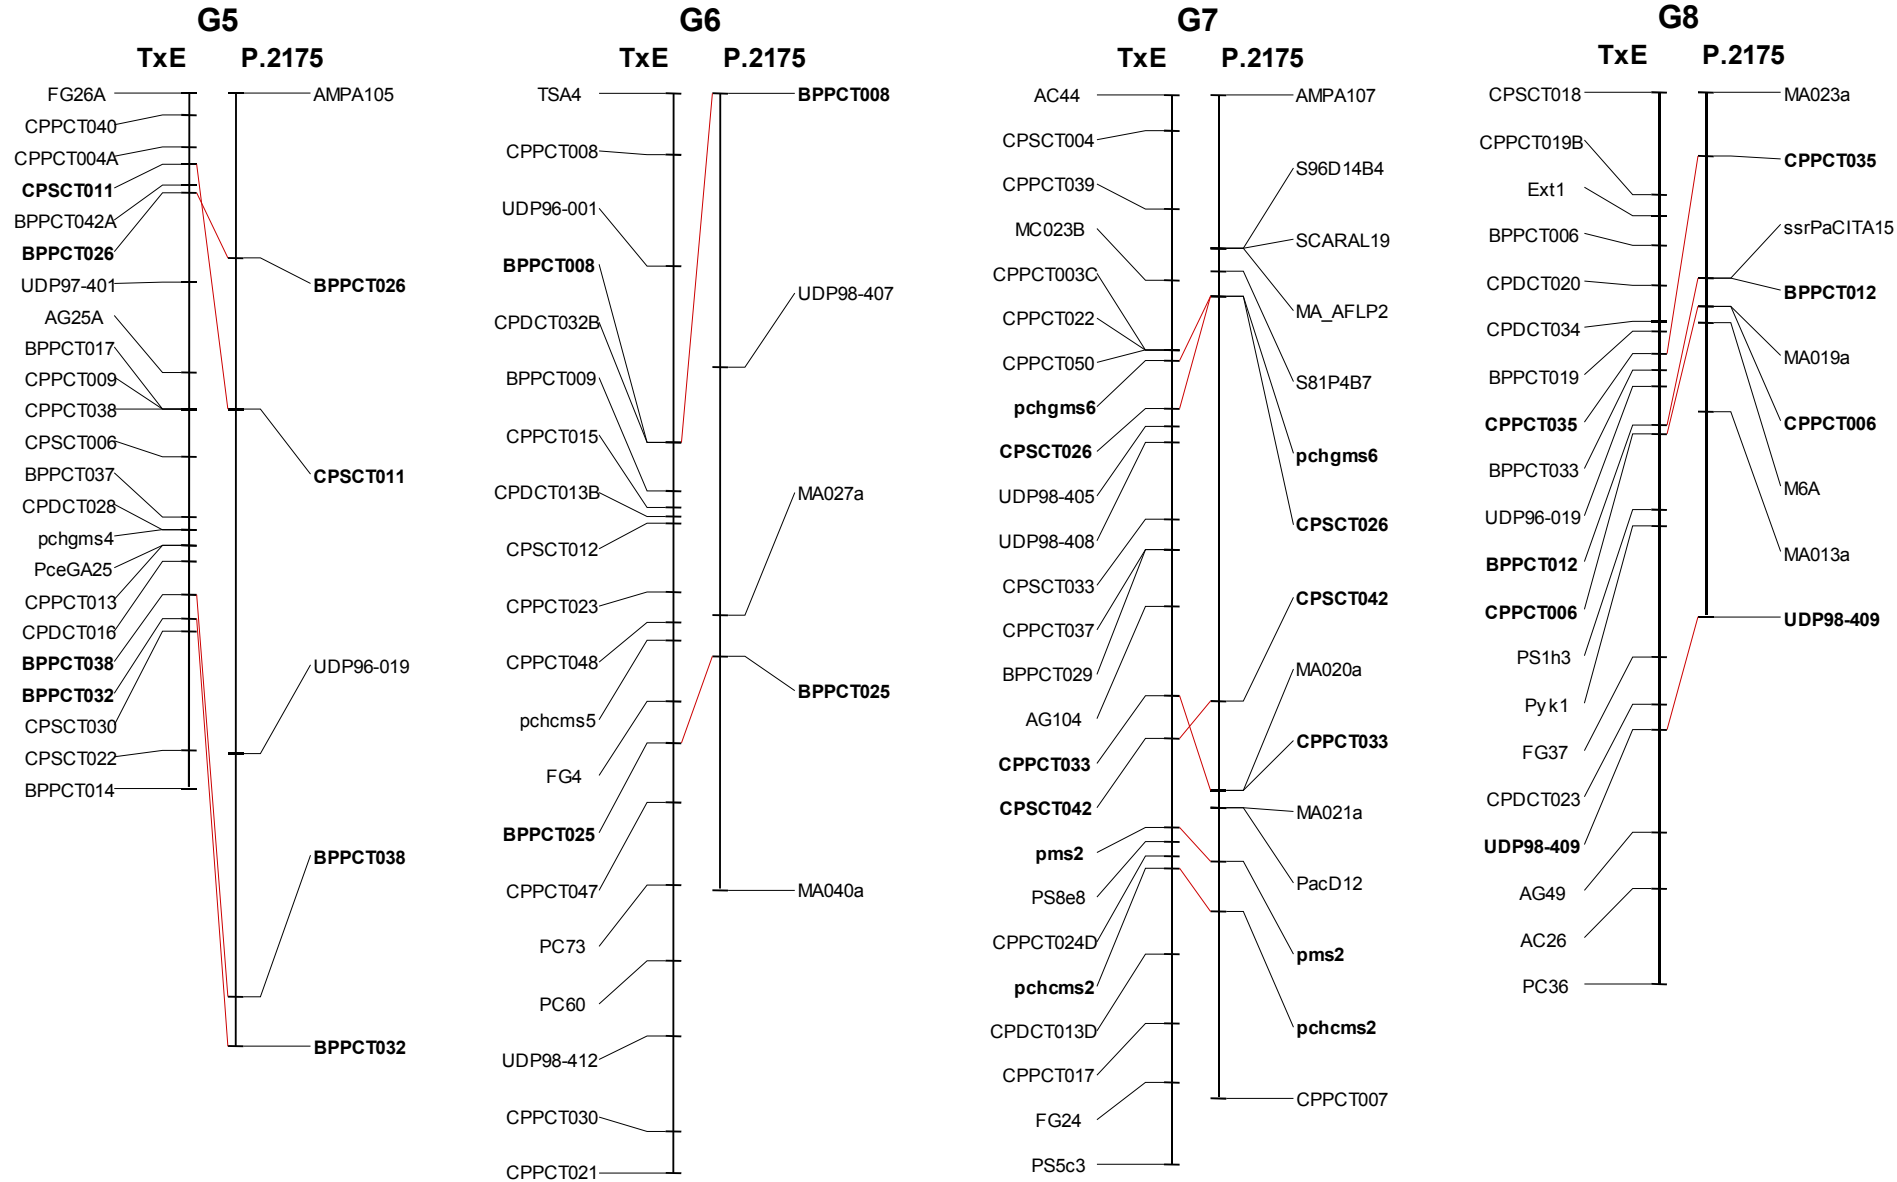

Supplement: pnas_101_26_9891__3.pdf [file pnas_101_26_9891__3.pdf]

## G1

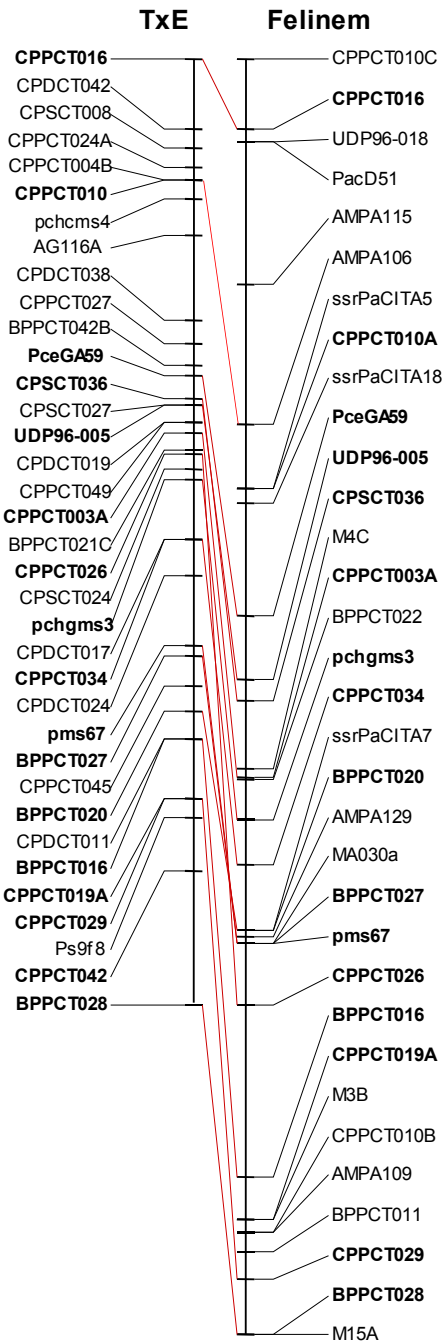

## G2

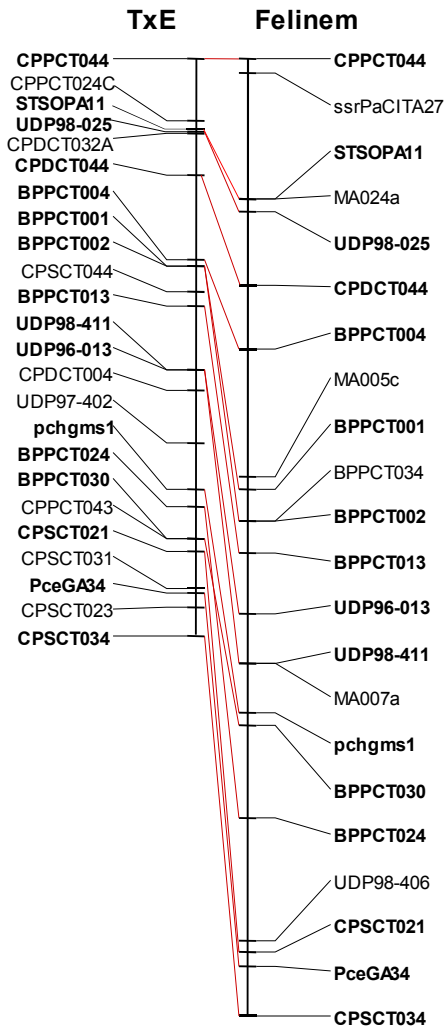

## G3

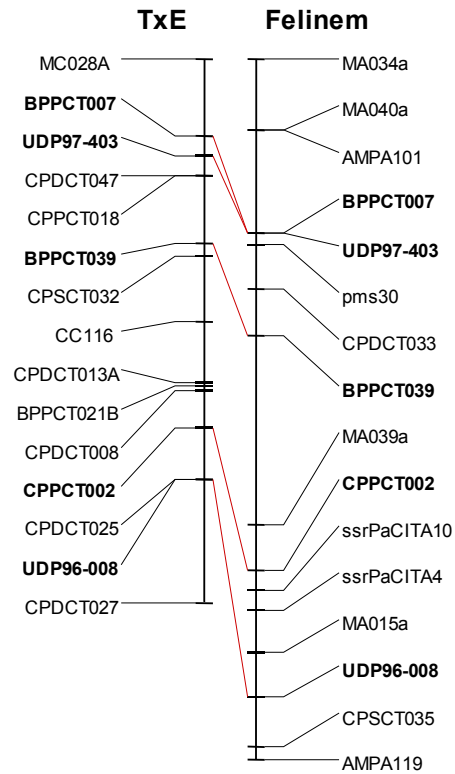

## G4

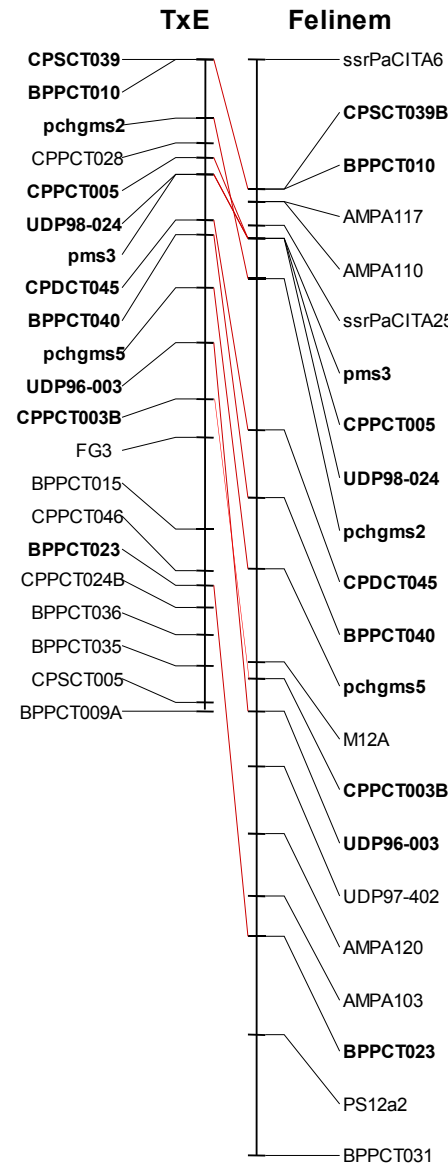

10 cM

**G5****TxE**      **Felinem**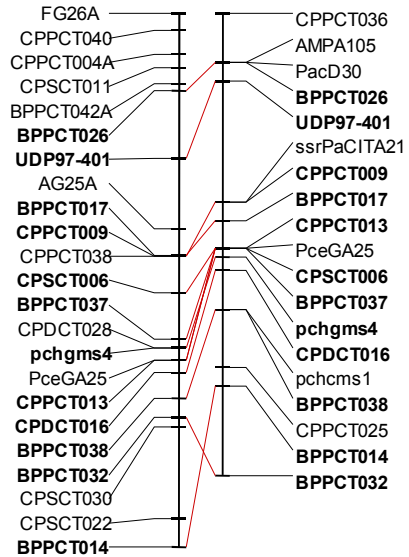**G6****TxE**      **Felinem**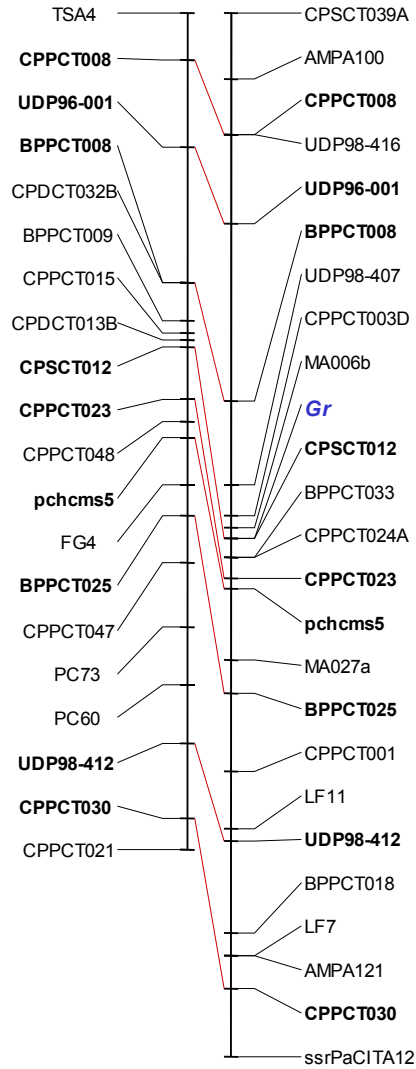**G7****TxE**      **Felinem**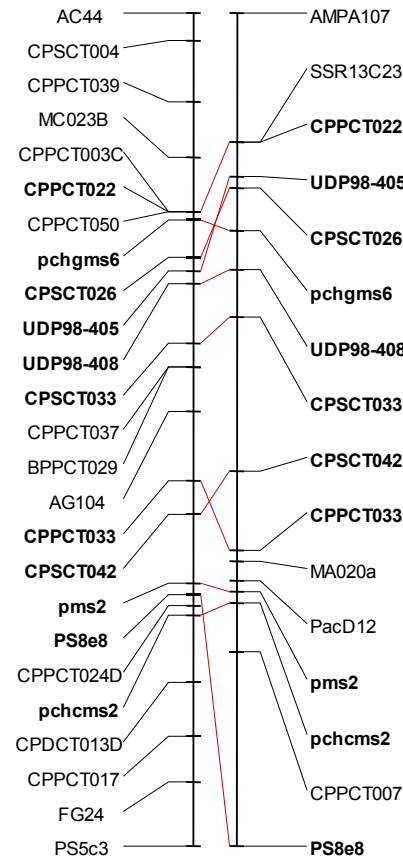**G8****TxE**      **Felinem**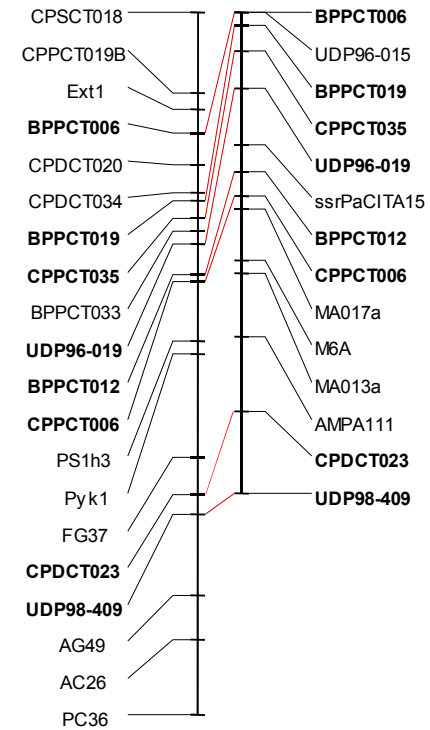

10 cM

Supplement: pnas_101_26_9891__4.pdf [file pnas_101_26_9891__4.pdf]

**G1**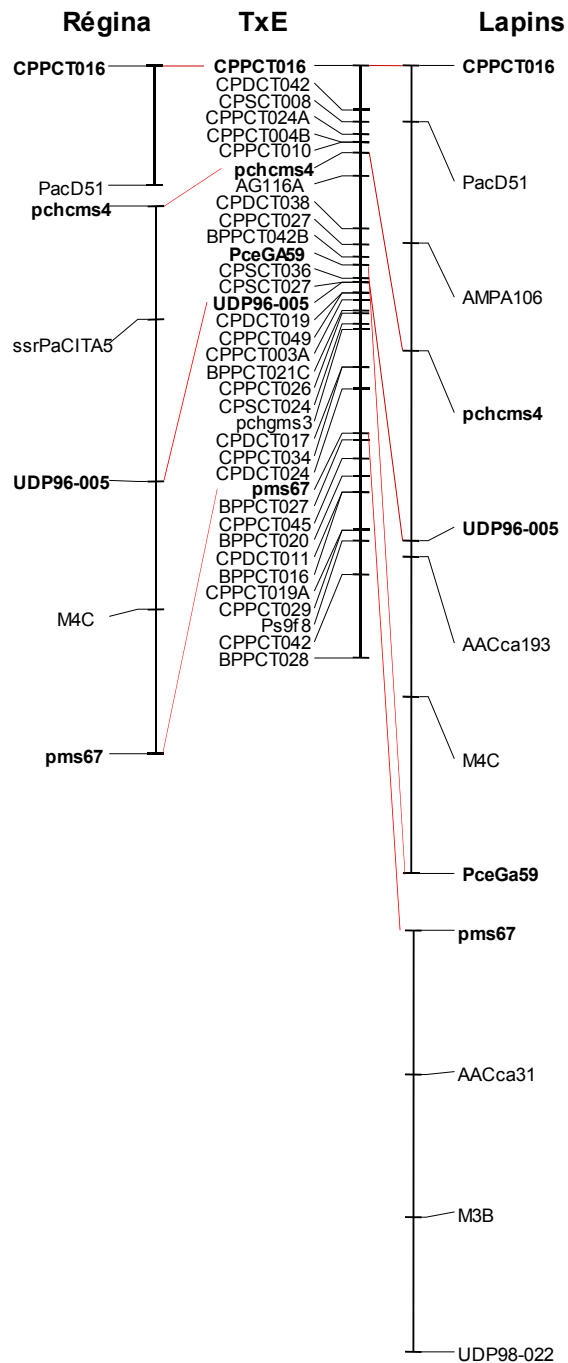**G2**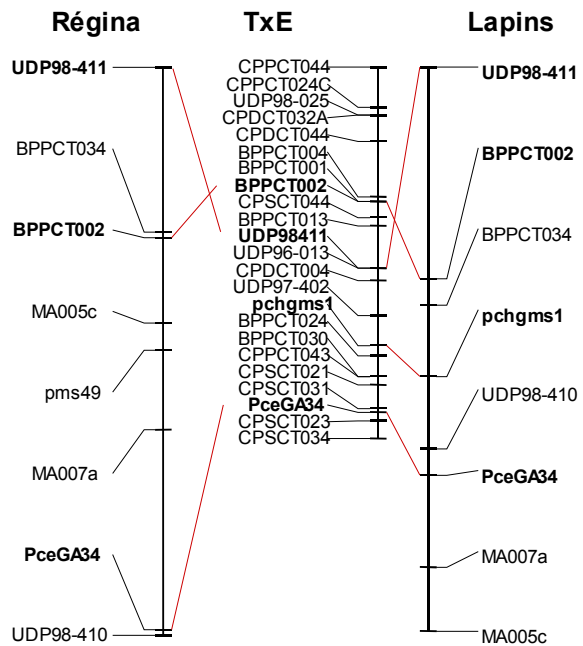**G3**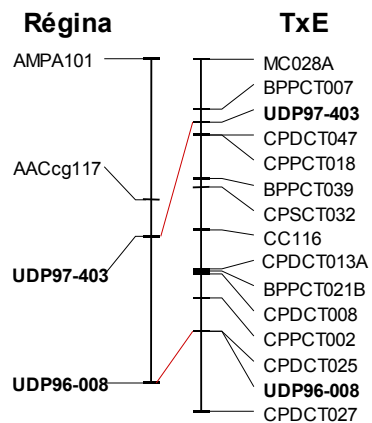**G4**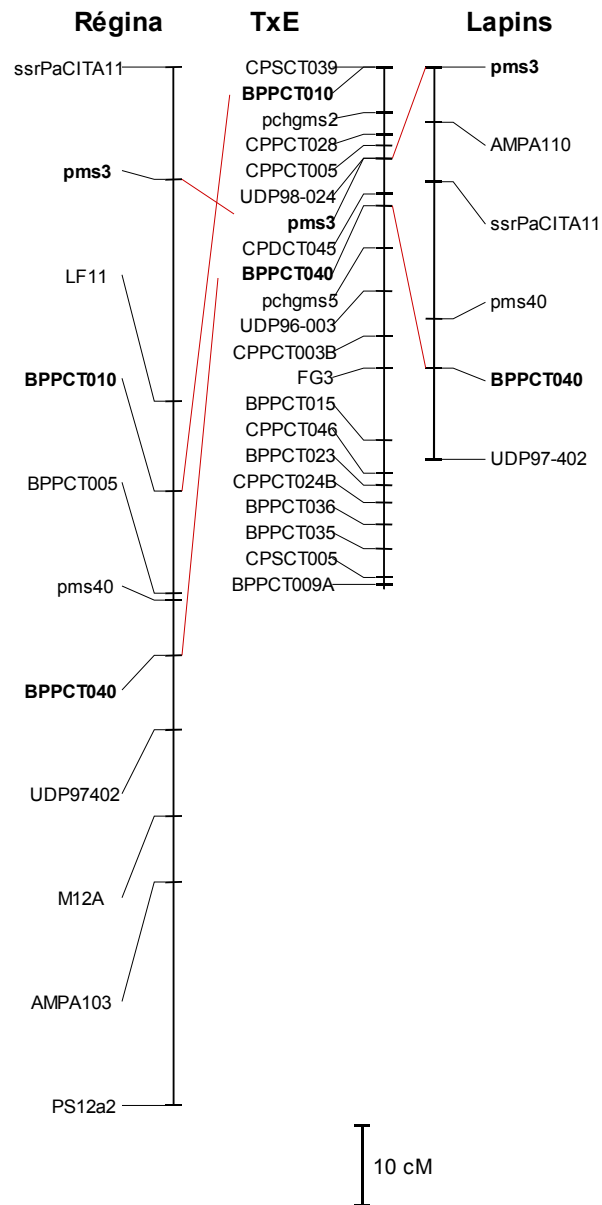

10 cM

### G5

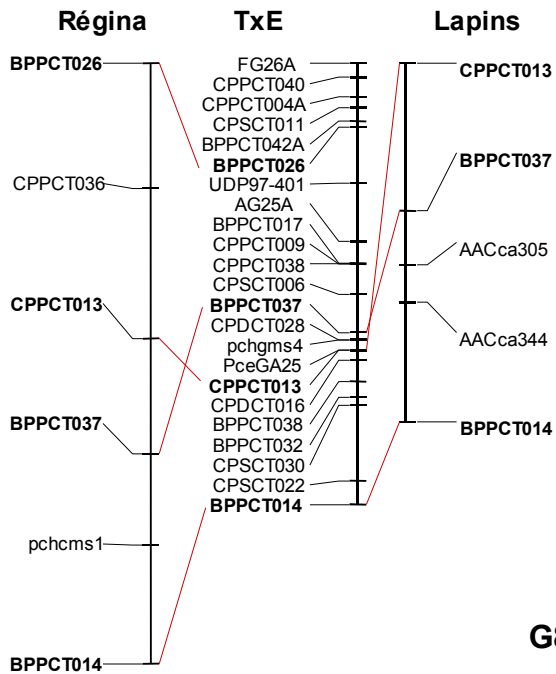

### G6

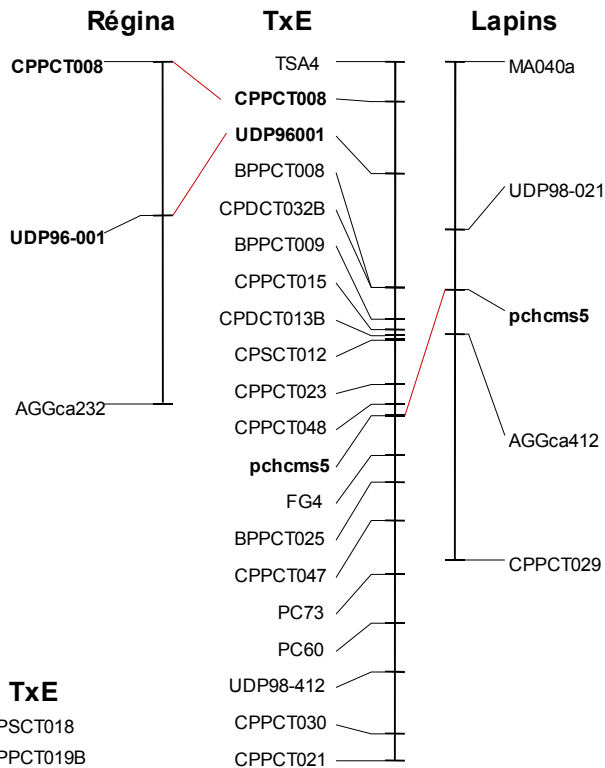

### G7

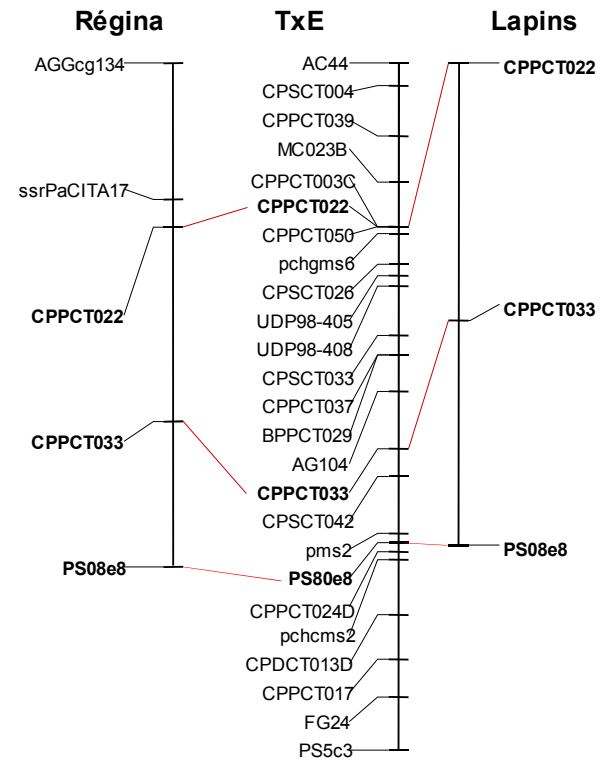

### G8

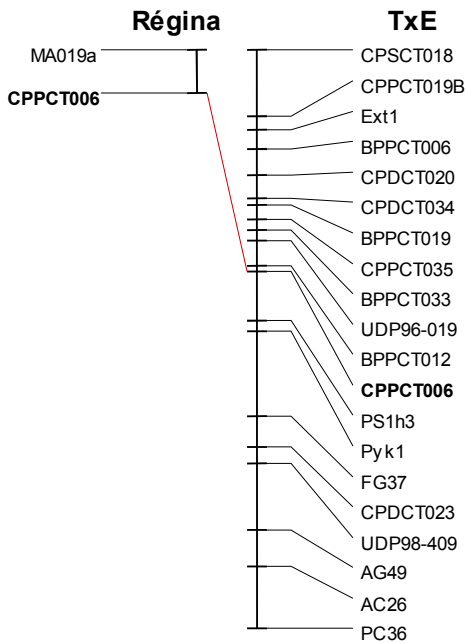

10 cM

Supplement: pnas_101_26_9891__5.pdf [file pnas_101_26_9891__5.pdf]
